# Supplementary material for: Direct observation of reversible bond homolysis by 2D EXSY NMR
Source: Royal Society of Chemistry journal article supplement (doi:10.1039/d2sc03028d), 2022-01-01
Supplement: d2sc03028d1.xlsx [file d2sc03028d1.xlsx]

## Sheet: 500NMR Temp Cal
setT(C)	set T(K)	actual T(K)	actual T (°C)
15	298.15	297.18	24.03
25	303.15	301.68	28.53
30	308.15	306.18	33.03
35	313.15	310.67	37.52
40	318.15	315.26	42.11
45	323.15	319.85	46.7
50	328.15	324.45	51.3
55	333.15	329.03	55.88
60	338.15	333.72	60.57
65	343.15	338.41	65.26
70	348.15	343	69.85
75	353.15	347.68	74.53
80	358.15	352.26	79.11
85	363.15	356.84	83.69
90	368.15	361.62	88.47
95	373.15	366.2	93.05
100	378.15	370.27	97.12
105	383.15	374.74	101.59
110	388.15	379.31	106.16
115	393.15	383.78	110.63
120	398.15	388.35	115.2
125	403.15	392.81	119.66
130	408.15	397.28	124.13
135	413.15	401.64	128.49
140	418.15	406.1	132.95
145	423.15	410.46	137.31
150	428.15	414.91	141.76
155	433.15	419.27	146.12
160
15
25
10
0
-10
-20
-30
-40

## Sheet: 2-Mes NMR
Run 1
T(K)	NMR integration of Dimer (corrected by # of proton)	NMR integration of Monomer (corrected by # of proton)	Dimer%	Monomer%	[dimer] (mol/L)	[monomer] (mol/L)	Keq	1/T	lnKeq	delta G (kcal/mol)
297.18	0.125	0.00556667	0.957365	0.0426347	0.00957365	0.000852693	7.59466e-05	0.00336496	-9.48548	5.60141
301.68	0.125	0.00801667	0.939732	0.0602681	0.00939732	0.00120536	0.000154608	0.00331477	-8.77462	5.26009
306.18	0.125	0.00996667	0.926155	0.0738454	0.00926155	0.00147691	0.000235518	0.00326605	-8.35373	5.08248
310.67	0.125	0.0133833	0.903288	0.096712	0.00903288	0.00193424	0.000414185	0.00321885	-7.7892	4.80851
315.26	0.125	0.0169167	0.880799	0.119201	0.00880799	0.00238403	0.000645277	0.00317199	-7.34583	4.6018
319.85	0.125	0.0216	0.85266	0.14734	0.0085266	0.00294679	0.00101841	0.00312647	-6.88951	4.37878
324.45	0.125	0.0286	0.813802	0.186198	0.00813802	0.00372396	0.00170408	0.00308214	-6.37473	4.10987
329.03	0.125	0.03595	0.776639	0.223361	0.00776639	0.00446723	0.00256955	0.00303924	-5.96403	3.89936
333.72	0.125	0.0445833	0.737101	0.262899	0.00737101	0.00525799	0.0037507	0.00299652	-5.58581	3.70414
338.41	0.125	0.0555	0.692521	0.307479	0.00692521	0.00614958	0.00546083	0.002955	-5.21015	3.50358
343	0.125	0.0670833	0.650759	0.349241	0.00650759	0.00698482	0.00749704	0.00291545	-4.89325	3.33511
slope	10156
Y-intersect	24.84
delta H (kcal/mol)	20.1809
delta S (cal/mol)	49.3594
Run 2
T(K)	NMR integration of Dimer (corrected by # of proton)	NMR integration of Monomer (corrected by # of proton)	Dimer%	Monomer%	[dimer] (mol/L)	[monomer] (mol/L)	Keq	1/T	lnKeq	delta G (kcal/mol)
297.18	0.125	0.00555	0.957488	0.0425124	0.00957488	0.000850249	7.55021e-05	0.00336496	-9.49135	5.60487
301.68	0.125	0.00785	0.940911	0.0590892	0.00940911	0.00118178	0.000148432	0.00331477	-8.81538	5.28453
306.18	0.125	0.0100833	0.925355	0.0746453	0.00925355	0.00149291	0.000240855	0.00326605	-8.33131	5.06884
310.67	0.125	0.0133	0.903832	0.0961678	0.00903832	0.00192336	0.00040929	0.00321885	-7.80109	4.81585
315.26	0.125	0.0168833	0.881006	0.118994	0.00881006	0.00237989	0.000642888	0.00317199	-7.34954	4.60413
319.85	0.125	0.02205	0.850051	0.149949	0.00850051	0.00299898	0.00105804	0.00312647	-6.85134	4.35452
324.45	0.125	0.02835	0.815129	0.184871	0.00815129	0.00369742	0.00167715	0.00308214	-6.39066	4.12014
329.03	0.125	0.0357667	0.777524	0.222476	0.00777524	0.00444951	0.00254631	0.00303924	-5.97311	3.9053
333.72	0.125	0.0454833	0.73321	0.26679	0.0073321	0.00533581	0.00388305	0.00299652	-5.55114	3.68114
338.41	0.125	0.0573	0.685683	0.314317	0.00685683	0.00628634	0.00576332	0.002955	-5.15624	3.46733
343	0.125	0.0694	0.643004	0.356996	0.00643004	0.00713992	0.00792816	0.00291545	-4.83733	3.297
slope	10300
Y-intersect	25.3
delta H (kcal/mol)	20.4671
delta S (cal/molT)	50.2735
Run 3
T(K)	NMR integration of Dimer (corrected by # of proton)	NMR integration of Monomer (corrected by # of proton)	Dimer%	Monomer%	[dimer] (mol/L)	[monomer] (mol/L)	Keq	1/T	lnKeq	delta G (kcal/mol)
297.18	0.125	0.00543333	0.958344	0.041656	0.00958344	0.00083312	7.24259e-05	0.00336496	-9.53295	5.62944
301.68	0.125	0.00783333	0.941029	0.0589711	0.00941029	0.00117942	0.000147821	0.00331477	-8.81951	5.287
306.18	0.125	0.00986667	0.926841	0.0731587	0.00926841	0.00146317	0.000230986	0.00326605	-8.37315	5.0943
310.67	0.125	0.0132333	0.904268	0.0957319	0.00904268	0.00191464	0.000405392	0.00321885	-7.81065	4.82175
315.26	0.125	0.0166667	0.882353	0.117647	0.00882353	0.00235294	0.000627451	0.00317199	-7.37385	4.61935
319.85	0.125	0.0219667	0.850533	0.149467	0.00850533	0.00298934	0.00105065	0.00312647	-6.85834	4.35897
324.45	0.125	0.0276833	0.818688	0.181312	0.00818688	0.00362624	0.00160618	0.00308214	-6.43389	4.14801
329.03	0.125	0.0355167	0.778735	0.221265	0.00778735	0.00442529	0.00251475	0.00303924	-5.98558	3.91345
333.72	0.125	0.0463833	0.729359	0.270641	0.00729359	0.00541282	0.00401703	0.00299652	-5.51721	3.65864
338.41	0.125	0.0571	0.686436	0.313564	0.00686436	0.00627128	0.00572944	0.002955	-5.16214	3.47129
343	0.125	0.0698	0.641684	0.358316	0.00641684	0.00716632	0.00800335	0.00291545	-4.82789	3.29056
slope	10390
Y-intersect	25.57
delta H (kcal/mol)	20.6459
delta S (cal/molT)	50.81
Run	1	2	3	Average	standard deviation
slope	10156	10300	10390
Y-intersect	24.84	25.3	25.57
delta H (kcal/mol)	20.1809	20.4671	20.6459	20.4313	0.234544
delta S (cal mol-1 K-1)	49.3594	50.2735	50.81	50.1476	0.733432
delta G at 298.15K (kcal/mol)	5.46442	5.47803	5.49691	5.47978	0.0163159

## Sheet: 2-Mes EPR
Run 1
T(°C)	T(K)	[dimer] (mol/L)	[monomer] (mol/L)	EPR integration of 2-Mes*	EPR integration of 0.020 mol/L 1	Keq	1/T	lnKeq
19.5	292.65	0.00977029	0.000459419	4792.54	208635	2.16028e-05	0.00341705	-10.7427
27.9	301.05	0.00963223	0.000735549	7162.56	194754	5.61691e-05	0.00332171	-9.78714
36.4	309.55	0.0094048	0.0011904	10684.5	179511	0.000150673	0.0032305	-8.8004
44.9	318.05	0.00910128	0.00179744	15132.4	168377	0.000354983	0.00314416	-7.94344
53.1	326.25	0.00869641	0.00260717	20466.3	157000	0.000781626	0.00306513	-7.15413
61.6	334.75	0.00820515	0.00358971	26163.6	145770	0.00157048	0.0029873	-6.45637
slope	10055
Y-intersect	23.639
delta H (kcal/mol)	19.9802
delta S (cal/mol)	46.9729
Run 2
	T(K)	[dimer] (mol/L)	[monomer] (mol/L)	EPR integration of 2-Mes*	EPR integration of 0.020 mol/L 1	Keq	1/T	lnKeq
19.5	292.65	0.00976855	0.000462909	4828.95	208635	2.19362e-05	0.00341705	-10.7274
27.9	301.05	0.00961206	0.000775879	7555.28	194754	6.26285e-05	0.00332171	-9.67829
36.4	309.55	0.00937253	0.00125494	11263.8	179511	0.000168032	0.0032305	-8.69136
44.9	318.05	0.0090455	0.001909	16071.6	168377	0.000402884	0.00314416	-7.81686
53.1	326.25	0.00860889	0.00278222	21840.4	157000	0.000899155	0.00306513	-7.01406
61.6	334.75	0.00804131	0.00391738	28551.8	145770	0.00190838	0.0029873	-6.2615
slope	10392
Y-intersect	24.831
delta H (kcal/mol)	20.6499
delta S (cal/mol)	49.3415
Run	1	2	Average	standard deviation
slope	10055	10392
Y-intersect	23.639	24.831
delta H (kcal/mol)	19.9802	20.6499	20.3151	0.473514
delta S (cal mol-1 K-1)	46.9729	49.3415	48.1572	1.67486
delta G at 298.15K (kcal/mol)	5.97525	5.9387	5.95698	0.0258463

## Sheet: 2-Me NMR
Run 1
T(K)	NMR integration of Dimer (corrected by # of proton)	NMR integration of Monomer (corrected by # of proton)	Dimer%	Monomer%	[dimer] (mol/L)	[monomer] (mol/L)	Keq	1/T	lnKeq	delta G (kcal/mol)
297.18	0.5	0.01695	0.967212	0.0327885	0.00967212	0.000655769	4.44612e-05	0.00336496	-10.0209	5.91758
301.68	0.5	0.0228	0.956389	0.0436113	0.00956389	0.000872226	7.95471e-05	0.00331477	-9.43916	5.65846
306.18	0.5	0.03	0.943396	0.0566038	0.00943396	0.00113208	0.000135849	0.00326605	-8.90397	5.41725
310.67	0.5	0.0387	0.92816	0.0718396	0.0092816	0.00143679	0.000222415	0.00321885	-8.41096	5.19234
315.26	0.5	0.0508	0.907771	0.0922295	0.00907771	0.00184459	0.000374821	0.00317199	-7.88906	4.94211
319.85	0.5	0.0631	0.887942	0.112058	0.00887942	0.00224116	0.00056567	0.00312647	-7.4775	4.75249
324.45	0.5	0.08555	0.853898	0.146102	0.00853898	0.00292204	0.000999922	0.00308214	-6.90783	4.45357
329.03	0.5	0.1081	0.822233	0.177767	0.00822233	0.00355534	0.00153733	0.00303924	-6.47771	4.23521
333.72	0.5	0.13745	0.784375	0.215625	0.00784375	0.0043125	0.00237101	0.00299652	-6.04444	4.00827
338.41	0.5	0.1675	0.749064	0.250936	0.00749064	0.00501873	0.00336255	0.002955	-5.69506	3.82965
343	0.5	0.2099	0.704325	0.295675	0.00704325	0.00591351	0.00496498	0.00291545	-5.30535	3.61598
slope	10522
Y-intersect	25.447
delta H (kcal/mol)	20.9082
delta S (cal/mol)	50.5656
Run 2
T(K)	NMR integration of Dimer (corrected by # of proton)	NMR integration of Monomer (corrected by # of proton)	Dimer%	Monomer%	[dimer] (mol/L)	[monomer] (mol/L)	Keq	1/T	lnKeq	delta G (kcal/mol)
297.18	0.5	0.0185	0.96432	0.0356798	0.0096432	0.000713597	5.28062e-05	0.00336496	-9.84888	5.81601
301.68	0.5	0.021	0.959693	0.0403071	0.00959693	0.000806142	6.77159e-05	0.00331477	-9.60019	5.75499
306.18	0.5	0.03175	0.940291	0.0597085	0.00940291	0.00119417	0.00015166	0.00326605	-8.79387	5.35027
310.67	0.5	0.03975	0.926355	0.0736452	0.00926355	0.0014729	0.000234192	0.00321885	-8.35937	5.16049
315.26	0.5	0.0535	0.903342	0.0966576	0.00903342	0.00193315	0.000413695	0.00317199	-7.79038	4.88029
319.85	0.5	0.068	0.880282	0.119718	0.00880282	0.00239437	0.000651268	0.00312647	-7.33659	4.66293
324.45	0.5	0.08175	0.859476	0.140524	0.00859476	0.00281049	0.000919029	0.00308214	-6.99219	4.50795
329.03	0.5	0.10975	0.820008	0.179992	0.00820008	0.00359984	0.00158033	0.00303924	-6.45012	4.21718
333.72	0.5	0.142	0.778816	0.221184	0.00778816	0.00442368	0.00251265	0.00299652	-5.98642	3.96979
slope	10697
Y-intersect	26.065
delta H (kcal/mol)	21.2559
delta S (cal/mol)	51.7936
Run 3
T(K)	NMR integration of Dimer (corrected by # of proton)	NMR integration of Monomer (corrected by # of proton)	Dimer%	Monomer%	[dimer] (mol/L)	[monomer] (mol/L)	Keq	1/T	lnKeq	delta G (kcal/mol)
297.18	1	0.031	0.969932	0.0300679	0.00969932	0.000601358	3.72842e-05	0.00336496	-10.1969	6.02154
301.68	1	0.0423	0.959417	0.0405833	0.00959417	0.000811667	6.8667e-05	0.00331477	-9.58624	5.74663
306.18	1	0.054	0.948767	0.0512334	0.00948767	0.00102467	0.000110664	0.00326605	-9.10901	5.542
310.67	1	0.076	0.929368	0.070632	0.00929368	0.00141264	0.000214721	0.00321885	-8.44617	5.21408
315.26	1	0.1034	0.90629	0.0937103	0.0090629	0.00187421	0.000387586	0.00317199	-7.85557	4.92113
319.85	1	0.134	0.881834	0.118166	0.00881834	0.00236332	0.000633369	0.00312647	-7.36446	4.68064
324.45	1	0.1654	0.858074	0.141926	0.00858074	0.00283851	0.000938979	0.00308214	-6.97072	4.49411
329.03	1	0.2045	0.83022	0.16978	0.0083022	0.0033956	0.0013888	0.00303924	-6.57931	4.30164
333.72	1	0.2529	0.798148	0.201852	0.00798148	0.00403703	0.00204193	0.00299652	-6.19386	4.10735
338.41	1	0.3321	0.750694	0.249306	0.00750694	0.00498611	0.00331178	0.002955	-5.71027	3.83989
343	1	0.3972	0.715717	0.284283	0.00715717	0.00568566	0.00451669	0.00291545	-5.39998	3.68048
slope	10710
Y-intersect	25.959
delta H (kcal/mol)	21.2818
delta S (cal mol-1 K-1)	51.583
Run	1	2	3	Average	standard deviation
slope	10522	10697	10710
Y-intersect	25.447	26.065	25.959
delta H (kcal/mol)	20.9082	21.2559	21.2818	21.1486	0.208626
delta S (cal mol-1 K-1)	50.5656	51.7936	51.583	51.314	0.656696
delta G at 298.15K (kcal/mol)	5.83207	5.81368	5.83207	5.82594	0.0106197

## Sheet: 2-Et NMR
Run 1
T(K)	NMR integration of Dimer (corrected by # of proton)	NMR integration of Monomer (corrected by # of proton)	Dimer%	Monomer%	[dimer] (mol/L)	[monomer] (mol/L)	Keq	1/T	lnKeq	delta G (kcal/mol)
297.18	0.5	0.0296	0.944109	0.0558912	0.00944109	0.00111782	0.00013235	0.00336496	-8.93006	5.27342
301.68	0.5	0.035	0.934579	0.0654206	0.00934579	0.00130841	0.000183178	0.00331477	-8.60505	5.15844
306.18	0.5	0.0439	0.919287	0.0807134	0.00919287	0.00161427	0.000283465	0.00326605	-8.16842	4.96974
310.67	0.5	0.0592	0.894134	0.105866	0.00894134	0.00211731	0.000501379	0.00321885	-7.59815	4.69057
315.26	0.5	0.0778	0.865351	0.134649	0.00865351	0.00269297	0.000838053	0.00317199	-7.08443	4.43805
319.85	0.5	0.0987	0.835143	0.164857	0.00835143	0.00329714	0.00130171	0.00312647	-6.64407	4.22279
324.45	0.5	0.1346	0.787898	0.212102	0.00787898	0.00424204	0.00228392	0.00308214	-6.08186	3.92105
329.03	0.5	0.1745	0.74129	0.25871	0.0074129	0.0051742	0.00361159	0.00303924	-5.62361	3.67679
333.72	0.5	0.2282	0.686625	0.313375	0.00686625	0.00626751	0.00572098	0.00299652	-5.16361	3.42416
338.41	0.5	0.2586	0.659109	0.340891	0.00659109	0.00681782	0.00705236	0.002955	-4.95439	3.33159
343	0.5	0.3363	0.597872	0.402128	0.00597872	0.00804257	0.0108189	0.00291545	-4.52646	3.08512
slope	10233
Y-intersect	25.378
delta H (kcal/mol)	20.3339
delta S (cal/mol)	50.4285
Run 2
T(K)	NMR integration of Dimer (corrected by # of proton)	NMR integration of Monomer (corrected by # of proton)	Dimer%	Monomer%	[dimer] (mol/L)	[monomer] (mol/L)	Keq	1/T	lnKeq	delta G (kcal/mol)
297.18	0.5	0.02625	0.950119	0.0498812	0.00950119	0.000997625	0.000104751	0.00336496	-9.16393	5.41152
301.68	0.5	0.0325	0.938967	0.0610329	0.00938967	0.00122066	0.000158685	0.00331477	-8.74859	5.24448
306.18	0.5	0.04725	0.913659	0.0863408	0.00913659	0.00172682	0.000326368	0.00326605	-8.02748	4.88399
310.67	0.5	0.059	0.894454	0.105546	0.00894454	0.00211091	0.000498175	0.00321885	-7.60456	4.69453
315.26	0.5	0.083025	0.857596	0.142404	0.00857596	0.00284808	0.000945846	0.00317199	-6.96343	4.36225
319.85	0.5	0.09725	0.83717	0.16283	0.0083717	0.00325659	0.00126681	0.00312647	-6.67125	4.24006
324.45	0.5	0.12725	0.79713	0.20287	0.0079713	0.00405739	0.00206521	0.00308214	-6.18252	3.98595
329.03	0.5	0.168	0.748503	0.251497	0.00748503	0.00502994	0.00338012	0.00303924	-5.68984	3.7201
333.72	0.5	0.1955	0.718907	0.281093	0.00718907	0.00562185	0.00439629	0.00299652	-5.42699	3.59882
slope	10426
Y-intersect	25.944
delta H (kcal/mol)	20.7174
delta S (cal/mol)	51.5532
Run 3
T(K)	NMR integration of Dimer (corrected by # of proton)	NMR integration of Monomer (corrected by # of proton)	Dimer%	Monomer%	[dimer] (mol/L)	[monomer] (mol/L)	Keq	1/T	lnKeq	delta G (kcal/mol)
297.18	0.5	0.0285	0.946074	0.0539262	0.00946074	0.00107852	0.000122952	0.00336496	-9.00372	5.31692
301.68	0.5	0.03675	0.931532	0.0684676	0.00931532	0.00136935	0.000201295	0.00331477	-8.51074	5.1019
306.18	0.5	0.0505	0.908265	0.0917348	0.00908265	0.0018347	0.000370609	0.00326605	-7.90036	4.80665
310.67	0.5	0.06125	0.890869	0.109131	0.00890869	0.00218263	0.000534744	0.00321885	-7.53372	4.6508
315.26	0.5	0.08025	0.861698	0.138302	0.00861698	0.00276605	0.000887902	0.00317199	-7.02665	4.40185
319.85	0.5	0.098	0.83612	0.16388	0.0083612	0.00327759	0.00128482	0.00312647	-6.65714	4.23109
324.45	0.5	0.13025	0.793336	0.206664	0.00793336	0.00413328	0.00215344	0.00308214	-6.14069	3.95898
329.03	0.5	0.17475	0.741015	0.258985	0.00741015	0.0051797	0.00362061	0.00303924	-5.62111	3.67516
333.72	0.5	0.22525	0.689417	0.310583	0.00689417	0.00621165	0.0055967	0.00299652	-5.18558	3.43873
slope	10261
Y-intersect	25.52
delta H (kcal/mol)	20.3896
delta S (cal mol-1 K-1)	50.7106
Run	1	2	3	Average	standard deviation
slope	10233	10426	10261
Y-intersect	25.378	25.944	25.52
delta H (kcal/mol)	20.3339	20.7174	20.3896	20.4803	0.207233
delta S (cal mol-1 K-1)	50.4285	51.5532	50.7106	50.8974	0.585151
delta G at 298.15K (kcal/mol)	5.29868	5.34686	5.27019	5.30525	0.0387546

## Sheet: 2-iPr NMR
Run 1
T(K)	NMR integration of Dimer (corrected by # of proton)	NMR integration of Monomer (corrected by # of proton)	Dimer%	Monomer%	[dimer] (mol/L)	[monomer] (mol/L)	Keq	1/T	lnKeq	delta G (kcal/mol)
297.18	0.5	0.0396	0.926612	0.0733877	0.00926612	0.00146775	0.000232492	0.00336496	-8.36665	4.94071
301.68	0.5	0.0596	0.893495	0.106505	0.00893495	0.00213009	0.000507814	0.00331477	-7.5854	4.54719
306.18	0.5	0.0708	0.875964	0.124036	0.00875964	0.00248073	0.000702542	0.00326605	-7.2608	4.41753
310.67	0.5	0.1028	0.829463	0.170537	0.00829463	0.00341075	0.0014025	0.00321885	-6.5695	4.05555
315.26	0.5	0.1355	0.786782	0.213218	0.00786782	0.00426436	0.00231128	0.00317199	-6.06995	3.80253
319.85	0.5	0.1854	0.729501	0.270499	0.00729501	0.00540998	0.00401204	0.00312647	-5.51846	3.50738
324.45	0.5	0.2137	0.700574	0.299426	0.00700574	0.00598851	0.00511898	0.00308214	-5.2748	3.40073
329.03	0.5	0.2785	0.642261	0.357739	0.00642261	0.00715478	0.00797043	0.00303924	-4.83202	3.15924
333.72	0.5	0.3297	0.602627	0.397373	0.00602627	0.00794745	0.0104811	0.00299652	-4.55818	3.02268
338.41	0.5	0.4385	0.532765	0.467235	0.00532765	0.0093447	0.0163906	0.002955	-4.11105	2.76448
343	0.5	0.6114	0.449883	0.550117	0.00449883	0.0110023	0.0269073	0.00291545	-3.61536	2.46413
slope	10138
Y-intersect	25.954
delta H (kcal/mol)	20.1452
delta S (cal/mol)	51.573
Run 2
T(K)	NMR integration of Dimer (corrected by # of proton)	NMR integration of Monomer (corrected by # of proton)	Dimer%	Monomer%	[dimer] (mol/L)	[monomer] (mol/L)	Keq	1/T	lnKeq	delta G (kcal/mol)
297.18	0.5	0.0388	0.927988	0.0720119	0.00927988	0.00144024	0.000223525	0.00336496	-8.40599	4.96394
301.68	0.5	0.0636	0.887154	0.112846	0.00887154	0.00225692	0.00057416	0.00331477	-7.4626	4.47358
306.18	0.5	0.0699	0.877347	0.122653	0.00877347	0.00245306	0.000685876	0.00326605	-7.28481	4.43214
310.67	0.5	0.08745	0.851136	0.148864	0.00851136	0.00297727	0.00104145	0.00321885	-6.86714	4.23929
315.26	0.5	0.1359	0.786287	0.213713	0.00786287	0.00427426	0.00232349	0.00317199	-6.06469	3.79923
319.85	0.5	0.1703	0.745935	0.254065	0.00745935	0.00508131	0.00346139	0.00312647	-5.66609	3.60121
324.45	0.5	0.23315	0.681989	0.318011	0.00681989	0.00636023	0.00593155	0.00308214	-5.12747	3.30574
329.03	0.5	0.2728	0.646998	0.353002	0.00646998	0.00706004	0.00770392	0.00303924	-4.86603	3.18147
333.72	0.5	0.3248	0.606208	0.393792	0.00606208	0.00787585	0.0102323	0.00299652	-4.58221	3.03861
slope	10377
Y-intersect	26.695
delta H (kcal/mol)	20.6201
delta S (cal/mol)	53.0455
Run 3
T(K)	NMR integration of Dimer (corrected by # of proton)	NMR integration of Monomer (corrected by # of proton)	Dimer%	Monomer%	[dimer] (mol/L)	[monomer] (mol/L)	Keq	1/T	lnKeq	delta G (kcal/mol)
297.18	0.5	0.0438	0.919456	0.0805443	0.00919456	0.00161089	0.000282227	0.00336496	-8.1728	4.82624
301.68	0.5	0.06035	0.892299	0.107701	0.00892299	0.00215401	0.000519978	0.00331477	-7.56172	4.533
306.18	0.5	0.06855	0.87943	0.12057	0.0087943	0.0024114	0.000661205	0.00326605	-7.32145	4.45443
310.67	0.5	0.10275	0.829531	0.170469	0.00829531	0.00340937	0.00140125	0.00321885	-6.57039	4.0561
315.26	0.5	0.13705	0.784868	0.215132	0.00784868	0.00430265	0.00235871	0.00317199	-6.04964	3.7898
319.85	0.5	0.17255	0.743439	0.256561	0.00743439	0.00513122	0.00354157	0.00312647	-5.64319	3.58665
324.45	0.5	0.2033	0.710934	0.289066	0.00710934	0.00578132	0.00470137	0.00308214	-5.3599	3.4556
329.03	0.5	0.27325	0.646621	0.353379	0.00646621	0.00706757	0.00772486	0.00303924	-4.86331	3.1797
333.72	0.5	0.3517	0.587061	0.412939	0.00587061	0.00825878	0.0116184	0.00299652	-4.45516	2.95436
slope	10084
Y-intersect	25.8
delta H (kcal/mol)	20.0379
delta S (cal mol-1 K-1)	51.267
Run	1	2	3	Average	standard deviation
slope	10138	10377	10084
Y-intersect	25.954	26.695	25.8
delta H (kcal/mol)	20.1452	20.6201	20.0379	20.2677	0.309849
delta S (cal mol-1 K-1)	51.573	53.0455	51.267	51.9618	0.950841
delta G at 298.15K (kcal/mol)	4.76866	4.80457	4.75259	4.77527	0.0266108

## Sheet: 2-Br NMR
Run 1
T(K)	NMR integration of Dimer (corrected by # of proton)	NMR integration of Monomer (corrected by # of proton)	Dimer%	Monomer%	[dimer] (mol/L)	[monomer] (mol/L)	Keq	1/T	lnKeq	delta G (kcal/mol)
310.67	0.5	0.0256	0.951294	0.0487062	0.00316781	0.000324384	3.32169e-05	0.00321885	-10.3125	6.36619
315.26	0.5	0.0328	0.938438	0.0615616	0.003125	0.00041	5.3792e-05	0.00317199	-9.83039	6.15826
319.85	0.5	0.0462	0.915416	0.0845844	0.00304833	0.000563332	0.000104104	0.00312647	-9.17012	5.82827
322.29	0.5	0.0556	0.899928	0.100072	0.00299676	0.000666479	0.000148225	0.0031028	-8.81678	5.64645
324.45	0.5	0.0588	0.894775	0.105225	0.0029796	0.000700802	0.000164829	0.00308214	-8.7106	5.61584
326.9	0.5	0.0662	0.88308	0.11692	0.00294066	0.000778686	0.000206196	0.00305904	-8.48668	5.51279
329.03	0.5	0.0753	0.869112	0.130888	0.00289414	0.000871716	0.000262561	0.00303924	-8.24503	5.39071
331.51	0.5	0.084	0.856164	0.143836	0.00285103	0.000957945	0.00032187	0.0030165	-8.04136	5.29718
333.72	0.5	0.103	0.829187	0.170813	0.00276119	0.00113761	0.000468696	0.00299652	-7.66556	5.08328
336.13	0.5	0.1124	0.81646	0.18354	0.00271881	0.00122238	0.000549581	0.00297504	-7.50635	5.01366
338.41	0.5	0.1277	0.796559	0.203441	0.00265254	0.00135492	0.000692092	0.002955	-7.27579	4.89262
340.74	0.5	0.1564	0.761731	0.238269	0.00253656	0.00158687	0.000992748	0.00293479	-6.91503	4.68205
343	0.5	0.1827	0.732386	0.267614	0.00243885	0.00178231	0.00130251	0.00291545	-6.64346	4.528
slope	11808
Y-intersect	27.685
delta H (kcal/mol)	23.4636
delta S (cal/mol)	55.0127
Run 2
T(K)	NMR integration of Dimer (corrected by # of proton)	NMR integration of Monomer (corrected by # of proton)	Monomer	Dimer%	Monomer%	[dimer] (mol/L)	[monomer] (mol/L)	Keq	1/T	lnKeq	delta G (kcal/mol)
297.18	108.4	54.2	1	0.981884	0.0181159	0.00515489	0.000190217	7.01909e-06	0.00336496	-11.8669	7.00768
310.67	38.54	19.27	1	0.950666	0.049334	0.004991	0.000518007	5.3763e-05	0.00321885	-9.83092	6.06893
315.26	31.22	15.61	1	0.939795	0.0602047	0.00493393	0.000632149	8.09929e-05	0.00317199	-9.42115	5.90189
319.85	23.89	11.945	1	0.92275	0.0772499	0.00484444	0.000811124	0.00013581	0.00312647	-8.90426	5.65929
324.45	18.23	9.115	1	0.901137	0.0988631	0.00473097	0.00103806	0.00022777	0.00308214	-8.38717	5.40732
329.03	14.39	7.195	1	0.877974	0.122026	0.00460937	0.00128127	0.000356155	0.00303924	-7.94014	5.19137
333.72	11.18	5.59	1	0.848255	0.151745	0.00445334	0.00159332	0.000570062	0.00299652	-7.46977	4.95345
338.41	8.78	4.39	1	0.814471	0.185529	0.00427597	0.00194805	0.000887495	0.002955	-7.02711	4.7254
343	6.82	3.41	1	0.773243	0.226757	0.00405952	0.00238095	0.00139645	0.00291545	-6.57382	4.48054
slope	11518
Y-intersect	27.066
delta H (kcal/mol)	22.8873
delta S (cal/mol)	53.7827
Run 3
T(K)	NMR integration of Dimer (corrected by # of proton)	NMR integration of Monomer (corrected by # of proton)	Dimer%	Monomer%	[dimer] (mol/L)	[monomer] (mol/L)	Keq	1/T	lnKeq	delta G (kcal/mol)
297.18	1	0.0203	0.980104	0.0198961	0.00416054	0.000168918	6.85807e-06	0.00336496	-11.8901	7.02139
301.68	1	0.0261	0.974564	0.0254361	0.00413702	0.000215953	1.12727e-05	0.00331477	-11.3931	6.8298
306.18	1	0.0334	0.96768	0.0323205	0.0041078	0.000274401	1.833e-05	0.00326605	-10.907	6.63589
310.67	1	0.046	0.956023	0.0439771	0.00405832	0.000373365	3.43496e-05	0.00321885	-10.2789	6.34549
315.26	1	0.0591	0.944198	0.0558021	0.00400812	0.00047376	5.59984e-05	0.00317199	-9.79019	6.13307
319.85	1	0.0801	0.92584	0.0741598	0.00393019	0.000629617	0.000100865	0.00312647	-9.20173	5.84836
324.45	1	0.098	0.910747	0.0892532	0.00386612	0.00075776	0.000148521	0.00308214	-8.81479	5.683
329.03	1	0.127	0.887311	0.112689	0.00376664	0.000956726	0.000243008	0.00303924	-8.32241	5.44131
333.72	1	0.1572	0.864155	0.135845	0.00366834	0.00115333	0.000362605	0.00299652	-7.9222	5.25347
338.41	1	0.2315	0.812018	0.187982	0.00344702	0.00159597	0.000738933	0.002955	-7.2103	4.84859
343	1	0.3025	0.767754	0.232246	0.00325912	0.00197177	0.00119292	0.00291545	-6.73135	4.58791
slope	11390
Y-intersect	26.359
delta H (kcal/mol)	22.633
delta S (cal/mol)	52.3778
Run 4
T(K)	NMR integration of Dimer (corrected by # of proton)	NMR integration of Monomer (corrected by # of proton)	Dimer%	Monomer%	[dimer] (mol/L)	[monomer] (mol/L)	Keq	1/T	lnKeq	delta G (kcal/mol)
297.18	1	0.0176	0.982704	0.0172956	0.00417158	0.00014684	5.16875e-06	0.00336496	-12.1729	7.18838
301.68	1	0.0244	0.976181	0.0238188	0.00414389	0.000202222	9.86842e-06	0.00331477	-11.5262	6.90955
306.18	1	0.0338	0.967305	0.0326949	0.00410621	0.00027758	1.87644e-05	0.00326605	-10.8835	6.62164
310.67	1	0.0471	0.955019	0.0449814	0.00405405	0.000381892	3.59742e-05	0.00321885	-10.2327	6.31696
315.26	1	0.0605	0.942951	0.0570486	0.00400283	0.000484342	5.86054e-05	0.00317199	-9.74468	6.10457
319.85	1	0.082	0.924214	0.0757856	0.00392329	0.00064342	0.000105521	0.00312647	-9.1566	5.81968
324.45	1	0.095	0.913242	0.086758	0.00387671	0.000736575	0.000139949	0.00308214	-8.87423	5.72133
329.03	1	0.128	0.886525	0.113475	0.0037633	0.000963404	0.000246631	0.00303924	-8.30762	5.43163
333.72	1	0.1488	0.870474	0.129526	0.00369516	0.00109968	0.000327265	0.00299652	-8.02474	5.32147
338.41	1	0.2391	0.807037	0.192963	0.00342587	0.00163825	0.000783412	0.002955	-7.15185	4.80928
343	1	0.3046	0.766518	0.233482	0.00325387	0.00198226	0.00120759	0.00291545	-6.71913	4.57958
slope	11745
Y-intersect	27.441
delta H (kcal/mol)	23.3384
delta S (cal mol-1 K-1)	54.5278
Run	1	2	3	4	Average	standard deviation
slope	11808	11518	11390	11745
Y-intersect	27.685	27.066	26.359	27.441
delta H (kcal/mol)	23.4636	22.8873	22.633	23.3384	23.0806	0.387666
delta S (cal mol-1 K-1)	55.0127	53.7827	52.3778	54.5278	53.9253	1.14899
delta G at 298.15K (kcal/mol)	7.06157	6.85204	7.01656	7.08094	7.00278	0.104047

## Sheet: 2-EtO NMR
Run 1
T(K)	NMR integration of Dimer (corrected by # of proton)	NMR integration of Monomer (corrected by # of proton)	Dimer%	Monomer%	[dimer] (mol/L)	[monomer] (mol/L)	Keq	1/T	lnKeq	delta G (kcal/mol)
297.18	0.5	0.0264	0.949848	0.050152	0.00949848	0.00100304	0.000105921	0.00336496	-9.15282	5.40496
301.68	0.5	0.0356	0.933532	0.0664675	0.00933532	0.00132935	0.000189299	0.00331477	-8.57218	5.13873
306.18	0.5	0.0416	0.923191	0.0768095	0.00923191	0.00153619	0.000255622	0.00326605	-8.27181	5.03264
310.67	0.5	0.0547	0.901388	0.0986119	0.00901388	0.00197224	0.000431526	0.00321885	-7.74818	4.78319
315.26	0.5	0.0701	0.877039	0.122961	0.00877039	0.00245922	0.000689565	0.00317199	-7.27945	4.56022
319.85	0.5	0.0877	0.850774	0.149226	0.00850774	0.00298452	0.00104697	0.00312647	-6.86186	4.3612
324.45	0.5	0.1112	0.818063	0.181937	0.00818063	0.00363874	0.00161851	0.00308214	-6.42625	4.14308
329.03	0.5	0.1452	0.774954	0.225046	0.00774954	0.00450093	0.00261414	0.00303924	-5.94682	3.88811
333.72	0.5	0.1802	0.735078	0.264922	0.00735078	0.00529844	0.00381912	0.00299652	-5.56774	3.69215
338.41	0.5	0.222	0.692521	0.307479	0.00692521	0.00614958	0.00546083	0.002955	-5.21015	3.50358
343	0.5	0.3088	0.6182	0.3818	0.006182	0.007636	0.00943199	0.00291545	-4.66365	3.17862
slope	9795.1
Y-intersect	23.796
delta H (kcal/mol)	19.4638
delta S (cal/mol)	47.2849
Run 2
T(K)	NMR integration of Dimer (corrected by # of proton)	NMR integration of Monomer (corrected by # of proton)	Dimer%	Monomer%	[dimer] (mol/L)	[monomer] (mol/L)	Keq	1/T	lnKeq	delta G (kcal/mol)
297.18	0.5	0.028	0.94697	0.0530303	0.0094697	0.00106061	0.000118788	0.00336496	-9.03817	5.33726
301.68	0.5	0.031	0.94162	0.0583804	0.0094162	0.00116761	0.000144783	0.00331477	-8.84027	5.29945
306.18	0.5	0.052	0.905797	0.0942029	0.00905797	0.00188406	0.000391884	0.00326605	-7.84454	4.77269
310.67	0.5	0.062	0.88968	0.11032	0.0088968	0.00220641	0.000547189	0.00321885	-7.51072	4.63659
315.26	0.5	0.077	0.866551	0.133449	0.00866551	0.00266898	0.000822045	0.00317199	-7.10372	4.45013
319.85	0.5	0.088	0.85034	0.14966	0.0085034	0.0029932	0.00105361	0.00312647	-6.85554	4.35719
324.45	0.5	0.115	0.813008	0.186992	0.00813008	0.00373984	0.00172033	0.00308214	-6.36524	4.10375
329.03	0.5	0.152	0.766871	0.233129	0.00766871	0.00466258	0.00283485	0.00303924	-5.86577	3.83512
333.72	0.5	0.187	0.727802	0.272198	0.00727802	0.00544396	0.00407208	0.00299652	-5.5036	3.64962
slope	9670
Y-intersect	23.495
delta H (kcal/mol)	19.2152
delta S (cal/mol)	46.6868
Run 3
T(K)	NMR integration of Dimer (corrected by # of proton)	NMR integration of Monomer (corrected by # of proton)	Dimer%	Monomer%	[dimer] (mol/L)	[monomer] (mol/L)	Keq	1/T	lnKeq	delta G (kcal/mol)
297.18	0.5	0.025	0.952381	0.047619	0.00952381	0.000952381	9.52381e-05	0.00336496	-9.25913	5.46774
301.68	0.5	0.037	0.931099	0.0689013	0.00931099	0.00137803	0.000203948	0.00331477	-8.49765	5.09405
306.18	0.5	0.055	0.900901	0.0990991	0.00900901	0.00198198	0.000436036	0.00326605	-7.73779	4.70773
310.67	0.5	0.067	0.881834	0.118166	0.00881834	0.00236332	0.000633369	0.00321885	-7.36446	4.5463
315.26	0.5	0.079	0.863558	0.136442	0.00863558	0.00272884	0.000862314	0.00317199	-7.05589	4.42017
319.85	0.5	0.1	0.833333	0.166667	0.00833333	0.00333333	0.00133333	0.00312647	-6.62007	4.20753
324.45	0.5	0.121	0.805153	0.194847	0.00805153	0.00389694	0.00188612	0.00308214	-6.27323	4.04443
329.03	0.5	0.156	0.762195	0.237805	0.00762195	0.0047561	0.0029678	0.00303924	-5.81993	3.80515
333.72	0.5	0.187	0.727802	0.272198	0.00727802	0.00544396	0.00407208	0.00299652	-5.5036	3.64962
slope	9707.9
Y-intersect	23.703
delta H (kcal/mol)	19.2905
delta S (cal mol-1 K-1)	47.1001
Run	1	2	3	Average	standard deviation
slope	9795.1	9670	9707.9
Y-intersect	23.796	23.495	23.703
delta H (kcal/mol)	19.4638	19.2152	19.2905	19.3232	0.127469
delta S (cal mol-1 K-1)	47.2849	46.6868	47.1001	47.0239	0.306247
delta G at 298.15K (kcal/mol)	5.36579	5.29554	5.24762	5.30298	0.0594391

## Sheet: 2-NEt2 NMR
Run 1
T(K)	NMR integration of Dimer (corrected by # of proton)	NMR integration of Monomer (corrected by # of proton)	Dimer%	Monomer%	[dimer] (mol/L)	[monomer] (mol/L)	Keq	1/T	lnKeq	delta G (kcal/mol)
297.18	0.5	0.063	0.888099	0.111901	0.00888099	0.00223801	0.000563979	0.00336496	-7.48049	4.41742
301.68	0.5	0.0864	0.85266	0.14734	0.0085266	0.00294679	0.00101841	0.00331477	-6.88951	4.13003
306.18	0.5	0.1006	0.832501	0.167499	0.00832501	0.00334998	0.00134803	0.00326605	-6.60911	4.02104
310.67	0.5	0.1244	0.800769	0.199231	0.00800769	0.00398463	0.00198275	0.00321885	-6.22327	3.84181
315.26	0.5	0.1598	0.757805	0.242195	0.00757805	0.00484389	0.00309622	0.00317199	-5.77757	3.61937
319.85	0.5	0.2018	0.712454	0.287546	0.00712454	0.00575093	0.00464215	0.00312647	-5.37258	3.41466
324.45	0.5	0.257	0.660502	0.339498	0.00660502	0.00678996	0.00698008	0.00308214	-4.9647	3.2008
329.03	0.5	0.3225	0.607903	0.392097	0.00607903	0.00784195	0.0101161	0.00303924	-4.59363	3.00337
333.72	0.5	0.4061	0.551815	0.448185	0.00551815	0.00896369	0.0145606	0.00299652	-4.22943	2.80468
338.41	0.5	0.5321	0.484449	0.515551	0.00484449	0.010311	0.021946	0.002955	-3.81917	2.56821
343	0.5	0.6574	0.432003	0.567997	0.00432003	0.0113599	0.0298721	0.00291545	-3.51083	2.39289
slope	8763.4
Y-intersect	22.04
delta H (kcal/mol)	17.4137
delta S (cal/mol)	43.7955
Run 2
T(K)	NMR integration of Dimer (corrected by # of proton)	NMR integration of Monomer (corrected by # of proton)	Dimer%	Monomer%	[dimer] (mol/L)	[monomer] (mol/L)	Keq	1/T	lnKeq	delta G (kcal/mol)
297.18	0.5	0.058	0.896057	0.103943	0.00896057	0.00207885	0.000482294	0.00336496	-7.63696	4.50981
301.68	0.5	0.074	0.87108	0.12892	0.0087108	0.0025784	0.000763206	0.00331477	-7.17798	4.30296
306.18	0.5	0.094	0.841751	0.158249	0.00841751	0.00316498	0.00119003	0.00326605	-6.73377	4.09688
310.67	0.5	0.122	0.803859	0.196141	0.00803859	0.00392283	0.00191434	0.00321885	-6.25838	3.86349
315.26	0.5	0.154	0.764526	0.235474	0.00764526	0.00470948	0.00290104	0.00317199	-5.84269	3.66016
319.85	0.5	0.196	0.718391	0.281609	0.00718391	0.00563218	0.00441563	0.00312647	-5.4226	3.44645
324.45	0.5	0.25	0.666667	0.333333	0.00666667	0.00666667	0.00666667	0.00308214	-5.01064	3.23042
329.03	0.5	0.312	0.615764	0.384236	0.00615764	0.00768473	0.00959054	0.00303924	-4.64698	3.03826
333.72	0.5	0.396	0.558036	0.441964	0.00558036	0.00883929	0.0140014	0.00299652	-4.2686	2.83065
slope	9185.3
Y-intersect	23.281
delta H (kcal/mol)	18.2521
delta S (cal/mol)	46.2615
Run 3
T(K)	NMR integration of Dimer (corrected by # of proton)	NMR integration of Monomer (corrected by # of proton)	Dimer%	Monomer%	[dimer] (mol/L)	[monomer] (mol/L)	Keq	1/T	lnKeq	delta G (kcal/mol)
297.18	0.5	0.059	0.894454	0.105546	0.00894454	0.00211091	0.000498175	0.00336496	-7.60456	4.49068
301.68	0.5	0.073	0.8726	0.1274	0.008726	0.00254799	0.000744014	0.00331477	-7.20345	4.31823
306.18	0.5	0.094	0.841751	0.158249	0.00841751	0.00316498	0.00119003	0.00326605	-6.73377	4.09688
310.67	0.5	0.123	0.802568	0.197432	0.00802568	0.00394864	0.00194273	0.00321885	-6.24366	3.8544
315.26	0.5	0.152	0.766871	0.233129	0.00766871	0.00466258	0.00283485	0.00317199	-5.86577	3.67462
319.85	0.5	0.196	0.718391	0.281609	0.00718391	0.00563218	0.00441563	0.00312647	-5.4226	3.44645
324.45	0.5	0.246	0.670241	0.329759	0.00670241	0.00659517	0.00648965	0.00308214	-5.03755	3.24777
329.03	0.5	0.311	0.616523	0.383477	0.00616523	0.00766954	0.00954091	0.00303924	-4.65217	3.04165
333.72	0.5	0.394	0.559284	0.440716	0.00559284	0.00881432	0.0138914	0.00299652	-4.27649	2.83588
slope	9122.8
Y-intersect	23.077
delta H (kcal/mol)	18.1279
delta S (cal mol-1 K-1)	45.8562
Run	1	2	3	Average	standard deviation
slope	8763.4	9185.3	9122.8
Y-intersect	22.04	23.281	23.077
delta H (kcal/mol)	17.4137	18.2521	18.1279	17.9312	0.452454
delta S (cal mol-1 K-1)	43.7955	46.2615	45.8562	45.3044	1.32234
delta G at 298.15K (kcal/mol)	4.35606	4.45918	4.45584	4.42369	0.058599
