# Supplementary material for: Direct observation of reversible bond homolysis by 2D EXSY NMR
Source: Royal Society of Chemistry journal article supplement (doi:10.1039/d2sc03028d), 2022-01-01
Supplement: d2sc03028d2.xlsx [file d2sc03028d2.xlsx]

## Sheet: 2-Mes
Run 1
T(K)	v1/2 (Hz)	k (s-1)	1/T	ln(k/T)	deltaG activation
297.18	1.789	0.628318	0.00336496	-6.15905	17.711
301.68	1.589	0	0.00331477	#NUM!	17.6982
306.18	2.581	3.11646	0.00326605	-4.58748	17.6855
310.67	1.629	0.125664	0.00321885	-7.81288	17.6728
315.26	2.039	1.41372	0.00317199	-5.40718	17.6599
319.85	2.743	3.6254	0.00312647	-4.47989	17.6469
324.45	4.357	8.69593	0.00308214	-3.61928	17.6339
329.03	6.276	14.7246	0.00303924	-3.10663	17.621
333.72	7.652	19.0475	0.00299652	-2.86337	17.6077
338.41	11.227	30.2787	0.002955	-2.41381	17.5945
343	16.139	45.7102	0.00291545	-2.01541	17.5815
Slope	9335.8
Intercept	25.182
delta Hǂ (kcal/mol)	18.5507
delta Sǂ (cal/mol)	2.82558
Run 2
T(K)	v1/2 (Hz)	k (s-1)	1/T	ln(k/T)	deltaG activation
297.18	2.528	1.5865	0.00336496	-5.23281	18.9309
301.68	2.161	0.43354	0.00331477	-6.54514	18.8007
306.18	2.023	0	0.00326605	#NUM!	18.6704
310.67	2.029	0.0188496	0.00321885	-9.71	18.5404
315.26	2.176	0.480664	0.00317199	-6.48599	18.4075
319.85	2.445	1.32575	0.00312647	-5.48587	18.2747
324.45	3.148	3.53429	0.00308214	-4.51962	18.1415
329.03	4.365	7.35761	0.00303924	-3.80041	18.0089
333.72	6.456	13.9267	0.00299652	-3.1765	17.8731
338.41	9.865	24.6364	0.002955	-2.62003	17.7374
343	15.674	42.8859	0.00291545	-2.07919	17.6045
Slope	14523
Intercept	40.296
delta Hǂ (kcal/mol)	28.8579
delta Sǂ (cal/mol)	32.8578
Run 3
T(K)	v1/2 (Hz)	k (s-1)	1/T	ln(k/T)	deltaG activation
297.18	2.446	1.58022	0.00336496	-5.23677	18.8561
301.68	2.084	0.442964	0.00331477	-6.52363	18.7321
306.18	1.943	0	0.00326605	#NUM!	18.608
310.67	2.323	1.1938	0.00321885	-5.56159	18.4843
315.26	2.242	0.939336	0.00317199	-5.81598	18.3577
319.85	2.68	2.31535	0.00312647	-4.92829	18.2312
324.45	3.268	4.16261	0.00308214	-4.35599	18.1044
329.03	4.556	8.20898	0.00303924	-3.69092	17.9782
333.72	6.531	14.4136	0.00299652	-3.14213	17.8489
338.41	9.884	24.9474	0.002955	-2.60749	17.7196
343	15.847	43.6807	0.00291545	-2.06082	17.5931
Slope	13589
Intercept	37.564
delta Hǂ (kcal/mol)	27.002
delta Sǂ (cal mol-1 K-1)	27.4292
Run	1	2	3	Average	Standard deviation
Slope	9335.8	14523	13589
Intercept	25.182	40.296	37.564
delta Hǂ (kcal/mol)	18.5507	28.8579	27.002
delta Sǂ (cal mol-1 K-1)	2.82558	32.8578	27.4292
delta Gǂ (kcal/mol)	17.7082	19.0613	18.824	18.5312	0.722507

## Sheet: 2-Me
Run1
T(K)	v1/2 (Hz)	k (s-1)	1/T	ln(k/T)	deltaG activation
297.18	2.311	0	0.00336496	#NUM!	17.7227
301.68	3.767	4.57416	0.00331477	-4.18894	17.7081
306.18	2.544	0.731991	0.00326605	-6.03616	17.69
310.67	2.621	0.973894	0.00321885	-5.76518	17.6719
315.26	2.956	2.02633	0.00317199	-5.04717	17.6533
319.85	4.208	5.9596	0.00312647	-3.98285	17.6348
324.45	5.45	9.86146	0.00308214	-3.4935	17.6162
329.03	6.461	13.0376	0.00303924	-3.22831	17.5978
333.72	9.017	21.0675	0.00299652	-2.76257	17.5788
338.41	12.085	30.7059	0.002955	-2.3998	17.5599
343	18.376	50.4697	0.00291545	-1.91636	17.5414
Slope	9524.5
Intercept	25.791
delta Hǂ (kcal/mol)	18.9256
delta Sǂ (cal/mol)	4.03569
Run 2
T(K)	v1/2 (Hz)	k (s-1)	1/T	ln(k/T)	deltaG activation
297.18	1.514	0.417832	0.00336496	-6.56701	18.8107
301.68	1.381	0	0.00331477	#NUM!	18.6872
306.18	1.443	0.194779	0.00326605	-7.36006	18.5637
310.67	1.57	0.593761	0.00321885	-6.26001	18.4405
315.26	1.803	1.32575	0.00317199	-5.47142	18.3145
319.85	2.152	2.42217	0.00312647	-4.88319	18.1885
324.45	2.884	4.72181	0.00308214	-4.22994	18.0623
329.03	4.112	8.57969	0.00303924	-3.64675	17.9366
333.72	6.068	14.7246	0.00299652	-3.12078	17.8079
338.41	12.085	33.6276	0.002955	-2.30891	17.5599
343	18.376	53.3914	0.00291545	-1.86008	17.5414
Slope	14551
Intercept	40.587
delta Hǂ (kcal/mol)	28.9135
delta Sǂ (cal/mol)	33.436
Run 3
T(K)	v1/2 (Hz)	k (s-1)	1/T	ln(k/T)	deltaG activation
297.18	2.28	2.82429	0.00336496	-4.65608	17.7263
301.68	1.504	0	0.00331477	#NUM!	17.7081
306.18	1.581	0.241903	0.00326605	-7.14339	17.69
310.67	1.504	0	0.00321885	#NUM!	17.6719
315.26	1.723	0.688009	0.00317199	-6.12735	17.6533
319.85	4.237	8.58597	0.00312647	-3.61772	17.6348
324.45	5.083	11.2438	0.00308214	-3.36232	17.6162
329.03	6.232	14.8534	0.00303924	-3.09792	17.5978
333.72	7.858	19.9617	0.00299652	-2.81649	17.5788
338.41	12.085	33.6276	0.002955	-2.30891	17.5599
343	18.376	53.3914	0.00291545	-1.86008	17.5414
Slope	9062.6
Intercept	24.478
delta Hǂ (kcal/mol)	18.0078
delta Sǂ (cal mol-1 K-1)	1.4267
Run	1	2	3	Average	Standard deviation
Slope	9524.5	14551	9062.6
Intercept	25.791	40.587	24.478
delta Hǂ (kcal/mol)	18.9256	28.9135	18.0078
delta Sǂ (cal mol-1 K-1)	4.03569	33.436	1.4267
delta Gǂ (kcal/mol)	17.7224	18.9446	17.5824	18.0831	0.749298

## Sheet: 2-Et
Run 1
T(K)	v1/2 (Hz)	k (s-1)	1/T	ln(k/T)	deltaG activation
297.18	1.985	0.311018	0.00336496	-6.86224	18.5352
301.68	1.886	0	0.00331477	#NUM!	18.4333
306.18	1.912	0.0816814	0.00326605	-8.2291	18.3314
310.67	3.187	4.08721	0.00321885	-4.33087	18.2297
315.26	2.676	2.48186	0.00317199	-4.84439	18.1258
319.85	2.977	3.42748	0.00312647	-4.53603	18.0219
324.45	3.737	5.81509	0.00308214	-4.02168	17.9177
329.03	5.049	9.93686	0.00303924	-3.4999	17.814
333.72	7.42	17.3856	0.00299652	-2.95466	17.7077
338.41	11.586	30.4734	0.002955	-2.4074	17.6015
343	18.011	50.6582	0.00291545	-1.91263	17.4976
Slope	12715
Intercept	35.157
delta Hǂ (kcal/mol)	25.2653
delta Sǂ (cal/mol)	22.6464
Run 2
T(K)	v1/2 (Hz)	k (s-1)	1/T	ln(k/T)	deltaG activation
297.18	1.756	0.468097	0.00336496	-6.45342	18.5352
301.68	1.607	0	0.00331477	#NUM!	18.4333
306.18	1.664	0.179071	0.00326605	-7.44415	18.3314
310.67	1.702	0.298451	0.00321885	-6.94788	18.2297
315.26	1.977	1.16239	0.00317199	-5.60292	18.1258
319.85	2.399	2.48814	0.00312647	-4.85632	18.0219
324.45	3.608	6.28633	0.00308214	-3.94375	17.9177
329.03	4.875	10.2667	0.00303924	-3.46724	17.814
333.72	7.835	19.5658	0.00299652	-2.83652	17.7077
338.41	11.382	30.7091	0.002955	-2.3997	17.6015
343	17.692	50.5325	0.00291545	-1.91511	17.4976
Slope	12275
Intercept	33.885
delta Hǂ (kcal/mol)	24.391
delta Sǂ (cal/mol)	20.1188
Run 3
T(K)	v1/2 (Hz)	k (s-1)	1/T	ln(k/T)	deltaG activation
297.18	1.633	0.260752	0.00336496	-7.03852	18.5352
301.68	1.565	0.0471239	0.00331477	-8.76434	18.4333
306.18	1.55	0	0.00326605	#NUM!	18.3314
310.67	1.663	0.355	0.00321885	-6.77437	18.2297
315.26	1.89	1.06814	0.00317199	-5.68748	18.1258
319.85	2.394	2.6515	0.00312647	-4.79273	18.0219
324.45	3.168	5.0831	0.00308214	-4.15621	17.9177
329.03	4.969	10.7411	0.00303924	-3.42207	17.814
333.72	7.835	19.7449	0.00299652	-2.82741	17.7077
338.41	11.238	30.4357	0.002955	-2.40864	17.6015
343	18.31	52.6531	0.00291545	-1.87401	17.4976
Slope	13369
Intercept	37.137
delta Hǂ (kcal/mol)	26.5648
delta Sǂ (cal mol-1 K-1)	26.5807
Run	1	2	3	Average	Standard deviation
Slope	12715	12275	13369
Intercept	35.157	33.885	37.137
delta Hǂ (kcal/mol)	25.2653	24.391	26.5648
delta Sǂ (cal/mol)	22.6464	20.1188	26.5807
delta Gǂ (kcal/mol)	18.5133	18.3926	18.6398	18.5152	0.123622

## Sheet: 2-iPr
Run 1
T(K)	v1/2 (Hz)	k (s-1)	1/T	ln(k/T)	deltaG activation
297.18	4.849	5.76482	0.00336496	-3.94256	17.7103
301.68	3.528	1.61478	0.00331477	-5.23017	17.6977
306.18	3.112	0.307876	0.00326605	-6.90223	17.6851
310.67	3.014	0	0.00321885	#NUM!	17.6725
315.26	3.226	0.666018	0.00317199	-6.15984	17.6596
319.85	3.856	2.64522	0.00312647	-4.7951	17.6467
324.45	5.09	6.52194	0.00308214	-3.90696	17.6338
329.03	7.228	13.2387	0.00303924	-3.21301	17.6209
333.72	10.871	24.6835	0.00299652	-2.60417	17.6078
338.41	16.89	43.5927	0.002955	-2.04937	17.5946
343	27.131	75.7658	0.00291545	-1.51008	17.5817
Slope	14272
Intercept	40.127
delta Hǂ (kcal/mol)	28.3591
delta Sǂ (cal/mol)	32.522
Run 2
T(K)	v1/2 (Hz)	k (s-1)	1/T	ln(k/T)	deltaG activation
297.18	1.705	0.0911062	0.00336496	-8.09007	18.9344
301.68	2.291	1.93208	0.00331477	-5.05077	18.7948
306.18	1.676	0	0.00326605	#NUM!	18.6553
310.67	1.738	0.194779	0.00321885	-7.37462	18.516
315.26	2.08	1.2692	0.00317199	-5.51501	18.3737
319.85	2.381	2.21482	0.00312647	-4.97268	18.2313
324.45	3.082	4.41708	0.00308214	-4.29665	18.0887
329.03	4.453	8.7242	0.00303924	-3.63005	17.9467
333.72	6.668	15.6828	0.00299652	-3.05774	17.8012
338.41	10.518	27.778	0.002955	-2.50002	17.6558
343	16.806	47.5323	0.00291545	-1.97632	17.5134
Slope	13824
Intercept	38.346
delta Hǂ (kcal/mol)	27.4689
delta Sǂ (cal/mol)	28.9831
Run 3
T(K)	v1/2 (Hz)	k (s-1)	1/T	ln(k/T)	deltaG activation
297.18	2.583	0.534071	0.00336496	-6.32157	17.7556
301.68	2.413	0	0.00331477	#NUM!	17.6997
306.18	3.737	4.15947	0.00326605	-4.29879	17.6437
310.67	4.293	5.90619	0.00321885	-3.96273	17.5879
315.26	4.879	7.74717	0.00317199	-3.70607	17.5309
319.85	5.361	9.26141	0.00312647	-3.542	17.4738
324.45	6.672	13.38	0.00308214	-3.18837	17.4166
329.03	8.406	18.8276	0.00303924	-2.86083	17.3597
333.72	12.678	32.2484	0.00299652	-2.33683	17.3014
338.41	17.999	48.9649	0.002955	-1.93316	17.2431
343	29.454	84.9518	0.00291545	-1.39565	17.186
Slope	10795
Intercept	30.017
delta Hǂ (kcal/mol)	21.4502
delta Sǂ (cal mol-1 K-1)	12.4329
Run	1	2	3	Average	Standard deviation
Slope	14272	13824	10795
Intercept	40.127	38.346	30.017
delta Hǂ (kcal/mol)	28.3591	27.4689	21.4502
delta Sǂ (cal mol-1 K-1)	32.522	28.9831	12.4329
delta Gǂ (kcal/mol)	18.6627	18.8276	17.7433	18.4112	0.584285

## Sheet: 2-Br
Run 1
T(K)	v1/2 (Hz)	k (s-1)	1/T	ln(k/T)	deltaG activation
297.18	2.121	0.609469	0.00336496	-6.18951	18.8053
310.67	1.927	0	0.00321885	#NUM!	18.4998
315.26	2.583	2.06088	0.00317199	-5.03026	18.3959
319.85	2.583	2.06088	0.00312647	-5.04472	18.292
324.45	3.164	3.88615	0.00308214	-4.42471	18.1879
329.03	4.044	6.65075	0.00303924	-3.90142	18.0842
333.72	5.477	11.1527	0.00299652	-3.39863	17.978
338.41	8.14	19.5187	0.002955	-2.85288	17.8718
343	13.365	35.9335	0.00291545	-2.25606	17.7679
Slope	12886
Intercept	35.262															n
delta Hǂ (kcal/mol)	25.6051
delta Sǂ (cal/mol)	22.855
Run 2
T(K)	v1/2 (Hz)	k (s-1)	1/T	ln(k/T)	deltaG activation
297.18	2.442	1.79071	0.00336496	-5.11173	18.8053
310.67	1.959	0.273319	0.00321885	-7.03585	18.4998
315.26	1.872	0	0.00317199	#NUM!	18.3959
319.85	2.171	0.939336	0.00312647	-5.83043	18.292
324.45	2.61	2.31849	0.00308214	-4.94121	18.1879
329.03	4.596	8.5577	0.00303924	-3.64932	18.0842
333.72	5.697	12.0166	0.00299652	-3.32401	17.978
338.41	Data not usable due to bad shimming
343	15.338	42.3047	0.00291545	-2.09283	17.7679
Slope	16070
Intercept	44.842
delta Hǂ (kcal/mol)	31.9318
delta Sǂ (cal/mol)	41.8909
Run 3
T(K)	v1/2 (Hz)	k (s-1)	1/T	ln(k/T)	deltaG activation
297.18	1.918	0	0.00336496	#NUM!	18.8053
310.67	2.313	1.24093	0.00321885	-5.52287	18.4998
315.26	2.098	0.565487	0.00317199	-6.32347	18.3959
319.85	2.271	1.10898	0.00312647	-5.66441	18.292
324.45	2.716	2.50699	0.00308214	-4.86305	18.1879
329.03	3.67	5.50407	0.00303924	-4.09066	18.0842
333.72	5.224	10.3861	0.00299652	-3.46983	17.978
338.41	7.783	18.4254	0.002955	-2.91053	17.8718
343	11.752	30.8944	0.00291545	-2.40716	17.7679
Slope	14602
Intercept	40.223
delta Hǂ (kcal/mol)	29.0148
delta Sǂ (cal mol-1 K-1)	32.7127
Run	1	2	3	Average	Standard deviation
Slope	12886	16070	14602
Intercept	35.262	44.842	40.223
delta Hǂ (kcal/mol)	25.6051	31.9318	29.0148
delta Sǂ (cal mol-1 K-1)	22.855	41.8909	32.7127
delta Gǂ (kcal/mol)	18.7909	19.4421	19.2615	19.1648	0.336203

## Sheet: 2-OEt
Run 1
T(K)	v1/2 (Hz)	k (s-1)	1/T	ln(k/T)	deltaG activation
297.18	2.525	0.483805	0.00336496	-6.42041	18.9675
301.68	2.458	0.273319	0.00331477	-7.00648	18.8484
306.18	2.371	0	0.00326605	#NUM!	18.7293
310.67	2.407	0.113097	0.00321885	-7.91824	18.6104
315.26	2.512	0.442964	0.00317199	-6.56766	18.4889
319.85	2.769	1.25035	0.00312647	-5.54443	18.3675
324.45	3.282	2.86199	0.00308214	-4.73061	18.2457
329.03	4.374	6.29261	0.00303924	-3.95677	18.1245
333.72	5.987	11.36	0.00299652	-3.3802	18.0004
338.41	8.655	19.7418	0.002955	-2.84152	17.8762
343	13.567	35.1733	0.00291545	-2.27744	17.7547
Slope		14428
Intercept		39.812
delta Hǂ (kcal/mol)		28.6691
delta Sǂ (cal mol-1 K-1)		31.8961
Run 2
T(K)	v1/2 (Hz)	k (s-1)	1/T	ln(k/T)	deltaG activation
297.18	7.803	7.72203	0.00336496	-3.65026	18.9675
301.68	7.132	5.61402	0.00331477	-3.9841	18.8484
306.18	6.59	3.91128	0.00326605	-4.36031	18.7293
310.67	5.81	1.46084	0.00321885	-5.35972	18.6104
315.26	5.345	0	0.00317199	#NUM!	18.4889
319.85	5.759	1.30062	0.00312647	-5.50501	18.3675
324.45	6.317	3.05363	0.00308214	-4.6658	18.2457
329.03	7.213	5.86849	0.00303924	-4.02655	18.1245
333.72	8.892	11.1432	0.00299652	-3.39947	18.0004
338.41	8.96	11.3569	0.002955	-3.39444	17.8762
343	12.823	23.4928	0.00291545	-2.68104	17.7547
Slope		11024
Intercept		29.413
delta Hǂ (kcal/mol)		21.9052
delta Sǂ (cal/mol)		11.2328
Run 3
T(K)	v1/2 (Hz)	k (s-1)	1/T	ln(k/T)	deltaG activation
297.18	1.975	0.289026	0.00336496	-6.93558	18.9675
301.68	2.233	1.09956	0.00331477	-5.61446	18.8484
306.18	1.885	0.00628318	0.00326605	-10.7941	18.7293
310.67	1.883	0	0.00321885	#NUM!	18.6104
315.26	2.026	0.449248	0.00317199	-6.55358	18.4889
319.85	2.333	1.41372	0.00312647	-5.42163	18.3675
324.45	2.88	3.13217	0.00308214	-4.64041	18.2457
329.03	3.886	6.29261	0.00303924	-3.95677	18.1245
333.72	5.613	11.7181	0.00299652	-3.34916	18.0004
338.41	8.398	20.4675	0.002955	-2.80542	17.8762
343	12.658	33.8507	0.00291545	-2.31577	17.7547
Slope		13900
Intercept		38.255
delta Hǂ (kcal/mol)		27.6199
delta Sǂ (cal mol-1 K-1)		28.8022
Run	1	2	3	Average	Standard deviation
Slope	14428	11024	13900
Intercept	39.812	29.413	38.255
delta Hǂ (kcal/mol)	28.6691	21.9052	27.6199
delta Sǂ (cal mol-1 K-1)	31.8961	11.2328	28.8022
delta Gǂ (kcal/mol)	19.1593	18.5561	19.0326	18.916	0.318017

## Sheet: 2-NEt2
Run 1
T(K)	v1/2 (Hz)	k (s-1)	1/T	ln(k/T)	deltaG activation
297.18	2.438	1.06186	0.00336496	-5.63432	18.8793
301.68	2.161	0.191637	0.00331477	-7.36152	18.755
306.18	2.1	0	0.00326605	#NUM!	18.6307
310.67	2.122	0.069115	0.00321885	-8.41071	18.5067
315.26	2.343	0.763407	0.00317199	-6.02336	18.3799
319.85	2.664	1.77186	0.00312647	-5.19582	18.2532
324.45	3.351	3.93013	0.00308214	-4.41346	18.1261
329.03	4.574	7.7723	0.00303924	-3.74558	17.9996
333.72	6.76	14.6398	0.00299652	-3.12656	17.8701
338.41	10.287	25.7202	0.002955	-2.57698	17.7405
343	14.76	39.7726	0.00291545	-2.15455	17.6138
Slope		13632
Intercept		37.66
delta Hǂ (kcal/mol)		27.0874
delta Sǂ (cal mol-1 K-1)		27.6199
Run 2
T(K)	v1/2 (Hz)	k (s-1)	1/T	ln(k/T)	deltaG activation
297.18	1.944	0.188496	0.00336496	-7.36302	18.8793
301.68	1.884	0	0.00331477	#NUM!	18.755
306.18	1.959	0.235619	0.00326605	-7.16971	18.6307
310.67	2.019	0.424115	0.00321885	-6.59648	18.5067
315.26	2.241	1.12155	0.00317199	-5.63869	18.3799
319.85	2.718	2.62009	0.00312647	-4.80464	18.2532
324.45	3.342	4.58044	0.00308214	-4.26034	18.1261
329.03	4.392	7.87911	0.00303924	-3.73193	17.9996
333.72	7.689	18.2369	0.00299652	-2.90685	17.8701
338.41	12.439	33.1595	0.002955	-2.32293	17.7405
Slope		14731
Intercept		41.174
delta Hǂ (kcal/mol)		29.2712
delta Sǂ (cal/mol)		34.6024
Run 3
T(K)	v1/2 (Hz)	k (s-1)	1/T	ln(k/T)	deltaG activation
297.18	2.253	1.28805	0.00336496	-5.44121	18.8793
301.68	1.843	0	0.00331477	#NUM!	18.755
306.18	1.903	0.188496	0.00326605	-7.39285	18.6307
310.67	2.053	0.659734	0.00321885	-6.15465	18.5067
315.26	2.254	1.29119	0.00317199	-5.49783	18.3799
319.85	2.696	2.67978	0.00312647	-4.78212	18.2532
324.45	3.415	4.93858	0.00308214	-4.18505	18.1261
329.03	4.511	8.38177	0.00303924	-3.67009	17.9996
333.72	8.051	19.503	0.00299652	-2.83973	17.8701
338.41	12.412	33.2035	0.002955	-2.3216	17.7405
Slope		14618
Intercept		40.877
delta Hǂ (kcal/mol)		29.0466
delta Sǂ (cal/mol)		34.0123
Run		1	2	3	Average	Standard deviation
Slope		13632	14731	14618
Intercept		37.66	41.174	40.877
delta Hǂ (kcal/mol)		27.0874	29.2712	29.0466
delta Sǂ (cal mol-1 K-1)		27.6199	34.6024	34.0123
delta Gǂ (kcal/mol)		18.8525	18.9545	18.9059	18.9043	0.0509872
